# Supplementary material for: Rubbing induced reversible fluorescence switching in thiophene-based organic semiconductor films by mechanical amorphisation
Source: Royal Society of Chemistry journal article supplement (doi:10.1039/d1tc01036k), 2021-01-01
Supplement: d1tc01036k1.pdf [file d1tc01036k1.pdf]

## Rubbing induced reversible fluorescence switching in thiophene derivate organic semiconductor film by mechanical amorphisation

*Massimiliano Cavallini\*, Ilse Manet, Marco Brucale, Laura Favaretto, Manuela Melucci, Lucia Maini, Fabiola Liscio, Michele della Ciana and Denis Gentili.*

### Supporting Information

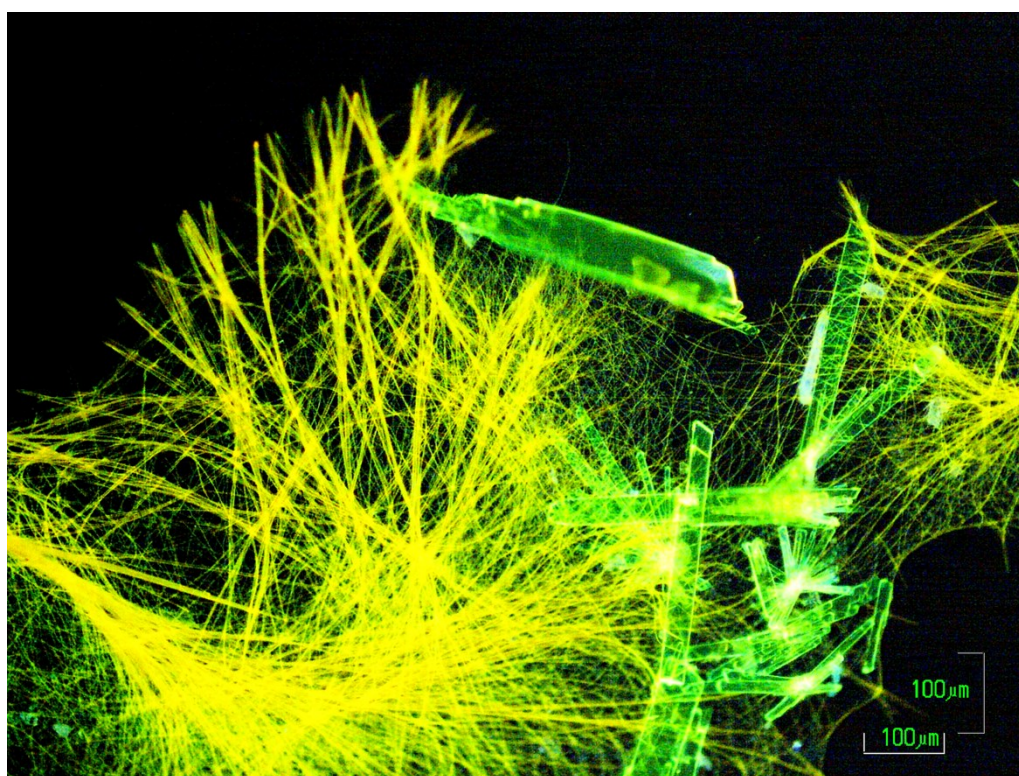

**Figure S1.** Large scale fluorescence image of **1** thin deposit prepared by drop casting
